# Supplementary material
Source: PubMed Central journal article supplement (PMC10330404)
Supplement: NIHMS1902877-supplement-Supplementary_Table_1.pdf [file NIHMS1902877-supplement-Supplementary_Table_1.pdf]

**Supplementary Table 1. Primary open-angle glaucoma (POAG) associated single nucleotide polymorphisms (SNPs) used to construct genetic risk scores.** Effect sizes ( $\beta$ ) and corresponding p-values were obtained from genome-wide association study summary statistics for POAG cases vs. controls.<sup>1</sup>

**TXNRD2**

| SNP rsID    | Effect Size ( $\beta$ ) | Standard Error | p-value |
|-------------|-------------------------|----------------|---------|
| rs11705143  | 0.211                   | 0.066          | 1.3E-3  |
| rs3788304   | 0.097                   | 0.043          | 2.3E-2  |
| rs737855    | 0.115                   | 0.040          | 4.4E-3  |
| rs58210408  | 0.217                   | 0.064          | 7.0E-4  |
| rs113206516 | 0.126                   | 0.057          | 2.6E-2  |
| rs11913319  | 0.082                   | 0.037          | 2.6E-2  |
| rs35934224  | 0.239                   | 0.049          | 1.4E-6  |
| rs9606171   | 0.134                   | 0.066          | 4.3E-2  |
| rs1015471   | 0.098                   | 0.038          | 9.7E-3  |
| rs35681796  | 0.246                   | 0.084          | 3.3E-3  |
| rs1005873   | 0.150                   | 0.053          | 4.9E-3  |
| rs2073771   | 0.108                   | 0.036          | 2.6E-3  |
| rs4819850   | 0.077                   | 0.034          | 2.3E-2  |
| rs13057265  | 0.110                   | 0.050          | 2.8E-2  |
| rs12484727  | 0.176                   | 0.082          | 3.3E-2  |
| rs7289747   | 0.225                   | 0.094          | 1.7E-2  |
| rs9606181   | 0.119                   | 0.051          | 2.0E-2  |
| rs4333017   | 0.133                   | 0.051          | 9.0E-3  |
| rs1110479   | 0.206                   | 0.079          | 9.0E-3  |
| rs887200    | 0.106                   | 0.051          | 3.9E-2  |

**ME3**

| SNP rsID    | Effect Size ( $\beta$ ) | Standard Error | p-value |
|-------------|-------------------------|----------------|---------|
| rs9645703   | 0.084                   | 0.040          | 3.7E-2  |
| rs7103271   | 0.106                   | 0.042          | 1.2E-2  |
| rs1824279   | 0.076                   | 0.035          | 3.1E-2  |
| rs183968995 | 0.161                   | 0.064          | 1.2E-2  |
| rs10898501  | 0.101                   | 0.035          | 3.6E-3  |
| rs7109521   | 0.079                   | 0.037          | 3.3E-2  |
| rs7109555   | 0.142                   | 0.044          | 1.1E-3  |
| rs949349    | 0.118                   | 0.039          | 2.4E-3  |
| rs11234705  | 0.096                   | 0.035          | 5.7E-3  |
| rs2051433   | 0.118                   | 0.058          | 4.3E-2  |
| rs12285344  | 0.114                   | 0.049          | 1.9E-2  |
| rs10792865  | 0.161                   | 0.056          | 3.9E-3  |
| rs17757676  | 0.096                   | 0.035          | 6.2E-3  |
| rs1938923   | 0.087                   | 0.042          | 3.8E-2  |
| rs56140354  | 0.128                   | 0.044          | 3.9E-3  |
| rs659301    | 0.193                   | 0.062          | 1.8E-3  |
| rs9943610   | 0.107                   | 0.043          | 1.4E-2  |
| rs528948    | 0.086                   | 0.035          | 1.4E-2  |
| rs575468    | 0.114                   | 0.036          | 1.3E-3  |
| rs7948924   | 0.131                   | 0.043          | 2.5E-3  |
| rs34227026  | 0.099                   | 0.050          | 4.8E-2  |
| rs1938930   | 0.080                   | 0.036          | 2.7E-2  |
| rs2512988   | 0.074                   | 0.034          | 3.1E-2  |
| rs6592313   | 0.089                   | 0.042          | 3.4E-2  |

**References**

1. Bailey JN, Loomis SJ, Kang JH, et al. Genome-wide association analysis identifies TXNRD2, ATXN2 and FOXC1 as susceptibility loci for primary open-angle glaucoma. *Nat Genet.* 2016;48(2):189-194.
