# Supplementary material
Source: PubMed Central journal article supplement (PMC10330404)
Supplement: NIHMS1902877-supplement-Supplementary_Table_2.pdf [file NIHMS1902877-supplement-Supplementary_Table_2.pdf]

**Supplementary Table 2. Summary of GRS results for additional glaucoma phenotypes among POAG cases in the NEIGHBORHOOD consortium.**

**A. Age at diagnosis (in years)**

| <b>GRS</b>          | <b>GRS Percentile</b> | <b>Mean (SD) Top GRS Percentile</b> | <b>Mean (SD) Bottom GRS Percentile</b> | <b>p-value</b> |
|---------------------|-----------------------|-------------------------------------|----------------------------------------|----------------|
| <i>TXNRD2</i>       | 1%                    | 63.1 (14.1) (n=25)                  | 67.9 (14.0) (n=22)                     | 0.24           |
|                     | 5%                    | 66.0 (12.8) (n=119)                 | 64.8 (14.2) (n=121)                    | 0.47           |
|                     | 10%                   | 64.6 (12.7) (n=242)                 | 64.4 (14.1) (n=241)                    | 0.90           |
| <i>ME3</i>          | 1%                    | 65.3 (14.4) (n=22)                  | 65.1 (17.0) (n=25)                     | 0.96           |
|                     | 5%                    | 63.6 (13.6) (n=124)                 | 65.6 (15.4) (n=124)                    | 0.28           |
|                     | 10%                   | 64.0 (13.6) (n=250)                 | 64.8 (15.1) (n=245)                    | 0.57           |
| <i>TXNRD2 + ME3</i> | 1%                    | 65.3 (12.2) (n=24)                  | 61.5 (17.2) (n=24)                     | 0.38           |
|                     | 5%                    | 63.2 (13.7) (n=126)                 | 65.2 (14.6) (n=123)                    | 0.26           |
|                     | 10%                   | 63.8 (13.4) (n=253)                 | 65.6 (14.1) (n=246)                    | 0.15           |

**B. Maximal cup-to-disc ratio**

| <b>GRS</b>          | <b>GRS Percentile</b> | <b>Mean (SD) Top GRS Percentile</b> | <b>Mean (SD) Bottom GRS Percentile</b> | <b>p-value</b> |
|---------------------|-----------------------|-------------------------------------|----------------------------------------|----------------|
| <i>TXNRD2</i>       | 1%                    | 0.78 (0.15) (n=24)                  | 0.79 (0.14) (n=24)                     | 0.72           |
|                     | 5%                    | 0.80 (0.16) (n=115)                 | 0.80 (0.16) (n=115)                    | 0.87           |
|                     | 10%                   | 0.80 (0.15) (n=232)                 | 0.81 (0.15) (n=224)                    | 0.65           |
| <i>ME3</i>          | 1%                    | 0.82 (0.10) (n=20)                  | 0.76 (0.14) (n=22)                     | 0.15           |
|                     | 5%                    | 0.83 (0.13) (n=115)                 | 0.80 (0.14) (n=105)                    | 0.08           |
|                     | 10%                   | 0.83 (0.13) (n=228)                 | 0.81 (0.14) (n=211)                    | 0.14           |
| <i>TXNRD2 + ME3</i> | 1%                    | 0.84 (0.11) (n=21)                  | 0.83 (0.15) (n=22)                     | 0.76           |
|                     | 5%                    | 0.82 (0.14) (n=115)                 | 0.80 (0.14) (n=109)                    | 0.27           |
|                     | 10%                   | 0.83 (0.14) (n=230)                 | 0.80 (0.15) (n=214)                    | 0.05           |

**C. Visual field mean deviation (in dB)**

| <b>GRS</b>          | <b>GRS Percentile</b> | <b>Mean (SD) Top GRS Percentile</b> | <b>Mean (SD) Bottom GRS Percentile</b> | <b>p-value</b> |
|---------------------|-----------------------|-------------------------------------|----------------------------------------|----------------|
| <i>TXNRD2</i>       | 1%                    | -8.3 (6.8) (n=20)                   | -8.1 (5.3) (n=15)                      | 0.93           |
|                     | 5%                    | -9.5 (8.3) (n=97)                   | -8.2 (7.0) (n=95)                      | 0.22           |
|                     | 10%                   | -9.9 (7.8) (n=192)                  | -8.8 (6.7) (n=188)                     | 0.14           |
| <i>ME3</i>          | 1%                    | -7.0 (6.1) (n=20)                   | -9.4 (6.6) (n=18)                      | 0.25           |
|                     | 5%                    | -8.6 (6.7) (n=87)                   | -8.4 (6.8) (n=100)                     | 0.83           |
|                     | 10%                   | -8.7 (6.9) (n=182)                  | -9.6 (7.7) (n=201)                     | 0.26           |
| <i>TXNRD2 + ME3</i> | 1%                    | -7.2 (4.7) (n=16)                   | -7.9 (6.4) (n=20)                      | 0.74           |
|                     | 5%                    | -7.9 (6.4) (n=91)                   | -8.7 (7.6) (n=89)                      | 0.46           |
|                     | 10%                   | -8.1 (6.5) (n=179)                  | -9.1 (7.3) (n=186)                     | 0.17           |

**D. Visual field pattern standard deviation (in dB)**

| <b>GRS</b>          | <b>GRS Percentile</b> | <b>Mean (SD) Top GRS Percentile</b> | <b>Mean (SD) Bottom GRS Percentile</b> | <b>p-value</b> |
|---------------------|-----------------------|-------------------------------------|----------------------------------------|----------------|
| <i>TXNRD2</i>       | 1%                    | 6.0 (3.1) (n=18)                    | 5.5 (3.7) (n=13)                       | 0.71           |
|                     | 5%                    | 6.1 (3.0) (n=83)                    | 5.7 (3.2) (n=80)                       | 0.39           |
|                     | 10%                   | 6.3 (3.2) (n=165)                   | 6.3 (3.6) (n=160)                      | 0.86           |
| <i>ME3</i>          | 1%                    | 5.4 (3.5) (n=18)                    | 7.1 (3.6) (n=16)                       | 0.18           |
|                     | 5%                    | 6.0 (3.5) (n=74)                    | 5.7 (3.2) (n=87)                       | 0.59           |
|                     | 10%                   | 6.2 (3.7) (n=153)                   | 6.0 (3.4) (n=166)                      | 0.61           |
| <i>TXNRD2 + ME3</i> | 1%                    | 6.6 (3.3) (n=15)                    | 7.1 (3.6) (n=19)                       | 0.73           |
|                     | 5%                    | 6.1 (3.7) (n=82)                    | 5.8 (3.2) (n=76)                       | 0.67           |
|                     | 10%                   | 5.8 (3.3) (n=154)                   | 6.0 (3.2) (n=157)                      | 0.64           |

**E. Need for glaucoma surgery**

| <b>GRS</b>          | <b>GRS Percentile</b> | <b>Prevalence Top GRS Percentile</b> | <b>Prevalence Bottom GRS Percentile</b> | <b>p-value</b> |
|---------------------|-----------------------|--------------------------------------|-----------------------------------------|----------------|
| <i>TXNRD2</i>       | 1%                    | 50.0% (n=6)                          | 0% (n=3)                                | Unable         |
|                     | 5%                    | 27.3% (n=33)                         | 18.2% (n=22)                            | 0.44           |
|                     | 10%                   | 31.3% (n=67)                         | 24.4% (n=41)                            | 0.44           |
| <i>ME3</i>          | 1%                    | 20.0% (n=5)                          | 12.5% (n=8)                             | 0.72           |
|                     | 5%                    | 29.2% (n=24)                         | 25.0% (n=28)                            | 0.74           |
|                     | 10%                   | 34.6% (n=52)                         | 28.5% (n=49)                            | 0.51           |
| <i>TXNRD2 + ME3</i> | 1%                    | 25.0% (n=8)                          | 20.0% (n=5)                             | 0.86           |
|                     | 5%                    | 25.8% (n=31)                         | 22.2% (n=18)                            | 0.78           |
|                     | 10%                   | 37.1% (n=62)                         | 25.6% (n=39)                            | 0.23           |

POAG=primary open-angle glaucoma; GRS= genetic risk score; SD= standard deviation; dB=decibels
