# Supplementary material
Source: PubMed Central journal article supplement (PMC10330404)
Supplement: NIHMS1902877-supplement-Supplementary_Table_3.pdf [file NIHMS1902877-supplement-Supplementary_Table_3.pdf]

**Supplementary Table 3. Summary of GRS results for paracentral visual field loss among POAG cases in the NEIGHBORHOOD and PROGRESSA cohorts.**

**A. NEIGHBORHOOD (n=2617 POAG cases)**

| <b>GRS</b>          | <b>GRS Percentile</b> | <b>Prevalence Top GRS Percentile</b> | <b>Prevalence Bottom GRS Percentile</b> | <b>p-value</b> | <b>Adjusted p-value<sup>1</sup></b> |
|---------------------|-----------------------|--------------------------------------|-----------------------------------------|----------------|-------------------------------------|
| <i>TXNRD2</i>       | 1%                    | 18.2% (n=11)                         | 20.0% (n=5)                             | 0.93           | 0.93                                |
|                     | 5%                    | 42.6% (n=47)                         | 36.6% (n=41)                            | 0.57           | 0.62                                |
|                     | 10%                   | 43.2% (n=95)                         | 42.9% (n=77)                            | 0.97           | 0.97                                |
| <i>ME3</i>          | 1%                    | 72.7% (n=11)                         | 14.3% (n=7)                             | 0.02           | 0.03                                |
|                     | 5%                    | 51.4% (n=37)                         | 44.4% (n=54)                            | 0.52           | 0.62                                |
|                     | 10%                   | 52.5% (n=80)                         | 43.3% (n=90)                            | 0.23           | 0.69                                |
| <i>TXNRD2 + ME3</i> | 1%                    | 88.9% (n=9)                          | 33.3% (n=12)                            | 0.01           | 0.03                                |
|                     | 5%                    | 41.3% (n=46)                         | 46.5% (n=43)                            | 0.62           | 0.62                                |
|                     | 10%                   | 46.6% (n=88)                         | 41.9% (n=93)                            | 0.53           | 0.80                                |

**B. PROGRESSA (n=816 POAG cases and suspects)**

| <b>GRS</b>          | <b>GRS Percentile</b> | <b>Prevalence Top GRS Percentile</b> | <b>Prevalence Bottom GRS Percentile</b> | <b>p-value</b> | <b>Adjusted p-value<sup>1</sup></b> |
|---------------------|-----------------------|--------------------------------------|-----------------------------------------|----------------|-------------------------------------|
| <i>TXNRD2</i>       | 1%                    | 0.0% (n=4)                           | 9.1% (n=11)                             | 1.0            | 1.0                                 |
|                     | 5%                    | 9.1% (n=22)                          | 2.2% (n=45)                             | 0.25           | 0.75                                |
|                     | 10%                   | 7.1% (n=56)                          | 2.5% (n=81)                             | 0.23           | 0.69                                |
| <i>ME3</i>          | 1%                    | 12.5% (n=8)                          | 16.7% (n=12)                            | 1.0            | 1.0                                 |
|                     | 5%                    | 3.2% (n=31)                          | 8.8% (n=45)                             | 0.64           | 0.69                                |
|                     | 10%                   | 7.6% (n=66)                          | 6.5% (n=92)                             | 1.0            | 1.0                                 |
| <i>TXNRD2 + ME3</i> | 1%                    | 12.5% (n=8)                          | 0.0% (n=12)                             | 0.4            | 1.0                                 |
|                     | 5%                    | 5.9% (n=34)                          | 6.1% (n=49)                             | 1.0            | 1.0                                 |
|                     | 10%                   | 4.8% (n=62)                          | 6.1% (n=82)                             | 1.0            | 1.0                                 |

**C. NEIGHBORHOOD + PROGRESSA combined (n=3433 POAG cases and suspects)**

| <b>GRS</b>          | <b>GRS Percentile</b> | <b>Prevalence Top GRS Percentile</b> | <b>Prevalence Bottom GRS Percentile</b> | <b>p-value</b> | <b>Adjusted p-value<sup>1</sup></b> |
|---------------------|-----------------------|--------------------------------------|-----------------------------------------|----------------|-------------------------------------|
| <i>TXNRD2</i>       | 1%                    | 13.3% (n=15)                         | 12.5% (n=16)                            | 0.95           | 0.95                                |
|                     | 5%                    | 31.9% (n=69)                         | 18.6% (n=86)                            | 0.06           | 0.18                                |
|                     | 10%                   | 29.8% (n=151)                        | 22.2% (n=158)                           | 0.12           | 0.20                                |
| <i>ME3</i>          | 1%                    | 47.4% (n=19)                         | 15.8% (n=19)                            | 0.04           | 0.06                                |
|                     | 5%                    | 29.4% (n=68)                         | 28.3% (n=99)                            | 0.87           | 0.87                                |
|                     | 10%                   | 32.2% (n=146)                        | 24.7% (n=182)                           | 0.13           | 0.20                                |
| <i>TXNRD2 + ME3</i> | 1%                    | 52.9% (n=17)                         | 16.7% (n=24)                            | 0.01           | 0.03                                |
|                     | 5%                    | 26.3% (n=80)                         | 25.0% (n=92)                            | 0.85           | 0.87                                |
|                     | 10%                   | 29.3% (n=150)                        | 25.1% (n=175)                           | 0.40           | 0.40                                |

<sup>1</sup>Adjustment for multiple comparisons was performed using the False Discovery Rate (FDR) method

POAG= primary open-angle glaucoma; GRS= genetic risk score
