# Supplementary material
Source: PubMed Central journal article supplement (PMC10330404)

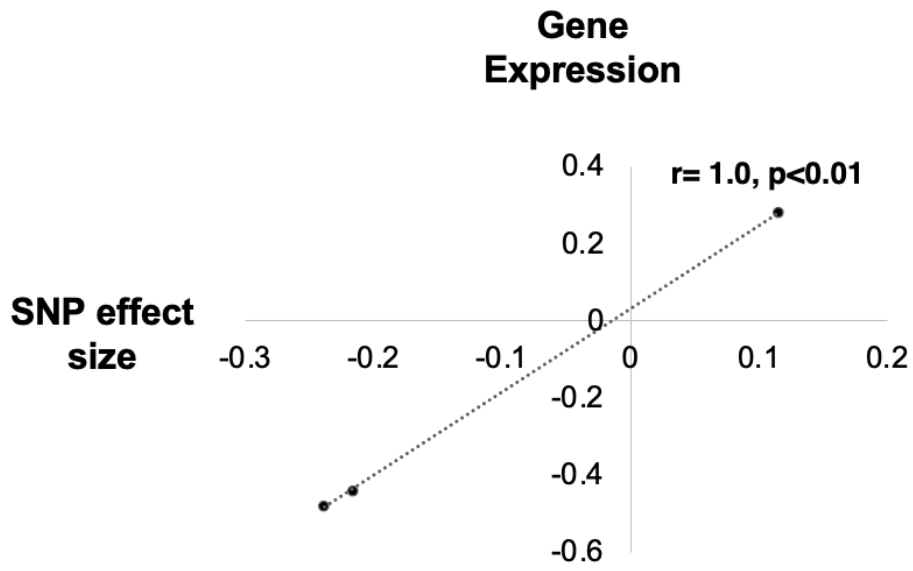

***TXNRD2***

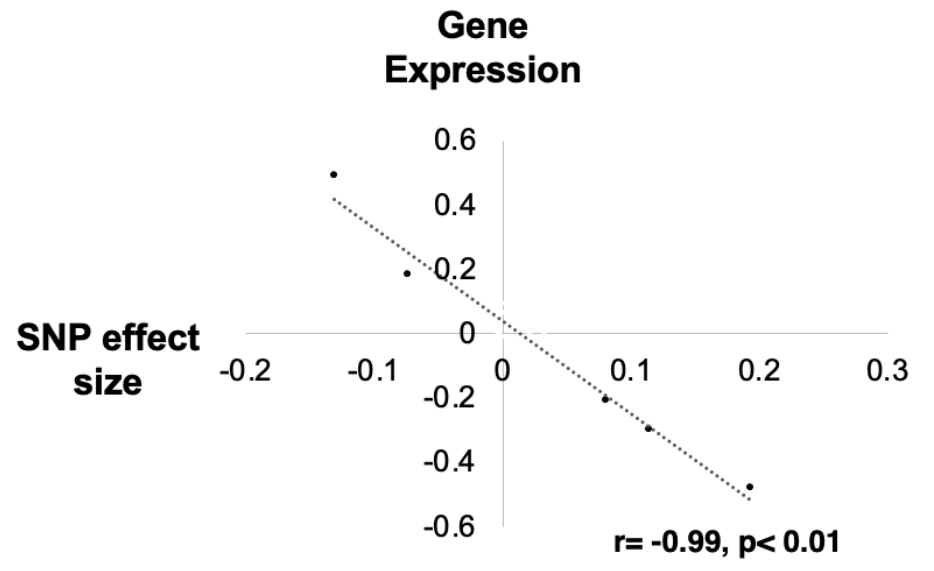

***ME3***

Supplement: NIHMS1902877-supplement-Supplementary_Figure_1.pdf [file NIHMS1902877-supplement-Supplementary_Figure_1.pdf]
